# Supplementary material for: Interventions to prevent hypothermia in extremely preterm low-weight infants undergoing cardiac catheterisation
Source: PubMed Central journal article supplement — BMJ Open Qual. 2022 Sep 19;11(3):e001773. doi: 10.1136/bmjoq-2021-001773 (PMC9486285; doi:10.1136/bmjoq-2021-001773), 2022-09-19
Supplement: bmjoq-2021-001773supp001.pdf [file bmjoq-2021-001773supp001.pdf]

### Checklist for thermoregulation improvement in PDA closure performed in cardiac catheterization suite

- Procedure room temperature set at highest temperature prior to transport and throughout the case.
- Forced Air warming (underbody bair hugger mattress) pre-warmed and used throughout procedure (except for brief period of skin disinfection and draping).
- Plastic covers and warm linen available and used on all patients immediately after transport to the procedure table.
- Additional procedures (intubation or additional intravenous access) performed in NICU prior to transport.
- All patients transported in pre-warmed transport incubators to and from the NICU.
- All ultrasound gel used during the procedure are pre-warmed and wiped immediately after exam completion.
- All fluids used during the procedure are pre-warmed.
- Esophageal temperature monitoring for all cases unless contraindicated.
